# Supplementary material
Source: PubMed Central journal article supplement (PMC5214964)
Supplement: NIHMS70743-supplement-Supplementary_Information.pdf [file NIHMS70743-supplement-Supplementary_Information.pdf]

**Supplementary Table I.** Overview of theoretical and measured molecular masses of F8-IL12p40 C175S mutants and deglycosylated variants investigated by LC-MS.

| Mutation                                       | Name         | theoretical mass <sup>b</sup> [Da] | measured mass <sup>c</sup> [Da] |                |                | differential mass [Da]          |                                 |                                 |                                |                                |
|------------------------------------------------|--------------|------------------------------------|---------------------------------|----------------|----------------|---------------------------------|---------------------------------|---------------------------------|--------------------------------|--------------------------------|
|                                                |              |                                    | m <sub>1</sub>                  | m <sub>2</sub> | m <sub>3</sub> | m <sub>1</sub> -m <sub>th</sub> | m <sub>2</sub> -m <sub>th</sub> | m <sub>3</sub> -m <sub>th</sub> | m <sub>2</sub> -m <sub>1</sub> | m <sub>3</sub> -m <sub>1</sub> |
| C175S, N25Q                                    | 1Q           | 61503.9                            | 65546.0                         | 65707.2        | -              | 4042.1                          | 4203.3                          | -                               | 161.2                          | -                              |
| C175S, N110Q                                   | 2Q           | 61503.9                            | 65381.7                         | 65706.9        | -              | 3877.8                          | 4203.0                          | -                               | 325.2                          | -                              |
| C175S, N198Q                                   | 3Q           | 61503.9                            | 63843.3                         | -              | -              | 2339.4                          | -                               | -                               | -                              | -                              |
| C175S, N298Q                                   | 4Q           | 61503.9                            | 63193.4                         | 63355.6        | -              | 1689.5                          | 1851.7                          | -                               | 162.2                          | -                              |
| C175S, N25Q, N110Q, N198Q                      | 123Q         | 61532.0                            | 63873.3                         | -              | -              | 2341.3                          | -                               | -                               | -                              | -                              |
| C175S, N25Q, N110Q, N298Q                      | 124Q         | 61532.0                            | 63223.8                         | 63384.5        | -              | 1691.8                          | 1852.5                          | -                               | 160.7                          | -                              |
| C175S, N25Q, N198Q, N298Q                      | 134Q         | 61532.0                            | 61521.4                         | -              | -              | -10.6                           | -                               | -                               | -                              | -                              |
| C175S, N25Q, N110Q, N198Q, N298Q               | 1234Q        | 61546.0                            | 61539.0                         | -              | -              | -7.0                            | -                               | -                               | -                              | -                              |
| C175S                                          | C175S        | 61489.9                            | 65539.7                         | 65702.4        | -              | 4049.8                          | 4212.5                          | -                               | 162.7                          | -                              |
| C175S; N198D <sup>a</sup> , N298D <sup>a</sup> | C175S deglyc | 61491.9                            | 61483.4                         | -              | -              | -8.5                            | -                               | -                               | -                              | -                              |
| C175S, N198Q, N298D <sup>a</sup>               | 3Q deglyc    | 61504.9                            | 61500.5                         | 63851.0        | -              | -4.4                            | 2346.1                          | -                               | 2350.5 <sup>d</sup>            | -                              |
| C175S, N198D <sup>a</sup> , N298Q              | 4Q deglyc    | 61504.9                            | 61498.3                         | 63200.9        | 63362.9        | -7.6                            | 1696.0                          | 1858.0                          | 1703.6 <sup>d</sup>            | 1865.6 <sup>d</sup>            |

<sup>a</sup> expected Asn-to-Asp transition during PNGase F reaction

<sup>c</sup> only peaks > 20% signal intensity included

<sup>b</sup> molecular mass based on amino acid sequence

<sup>d</sup> used to elucidate putative glycan structures

## Supplementary Information

**SUPPLEMENTARY FIGURE 1:** SDS-PAGE analysis of 1) F8-IL12p40 C175S and 2) enzymatically deglycosylated F8-IL12p40 C175S after denaturation and reduction.

**SUPPLEMENTARY FIGURE 2:** ESI/LC-MS mass spectra of F8-IL12p40 C175S mutants 3Q (N198Q) and 4Q (N298Q) after partial deglycosylation with PNGase F and putative N-glycan structures predicted from the observed mass differences.

**SUPPLEMENTARY FIGURE 3:** Neuraminic acid (NeuNAc) quantification of F8-IL12p40 C175S variants and corresponding calibration curve.

**SUPPLEMENTARY FIGURE 4A:** DNA Sequences of F8-IL12p40 C175S and the mutants 1Q, 2Q, 3Q.

**SUPPLEMENTARY FIGURE 4B:** DNA Sequences of F8-IL12p40 C175S mutants 4Q, 123Q, 124Q and 134Q.

1  
2  
3  
4  
5  
6  
7  
8  
9  
10  
11  
12  
13  
14  
15  
16  
17  
18  
19  
20  
21  
22  
23  
24  
25  
26  
27  
28  
29  
30  
31  
32  
33  
34  
35  
36  
37  
38  
39  
40  
41  
42  
43  
44  
45  
46  
47  
48  
49  
50  
51  
52  
53  
54  
55  
56  
57  
58  
59  
60

For Peer Review

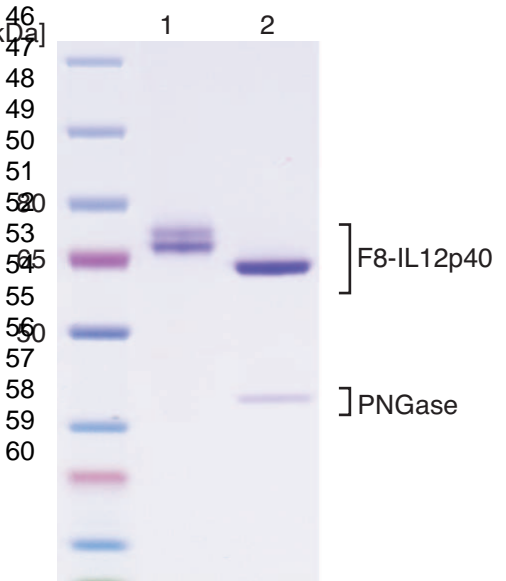

1  
2  
3  
4  
5  
6  
7  
8  
9  
10  
11  
12  
13  
14  
15  
16  
17  
18  
19  
20  
21  
22  
23  
24  
25  
26  
27  
28  
29  
30  
31  
32  
33  
34  
35  
36  
37  
38  
39  
40  
41  
42  
43  
44  
45  
46  
47  
48  
49  
50  
51  
52  
53  
54  
55  
56  
57  
58  
59  
60

For Peer Review

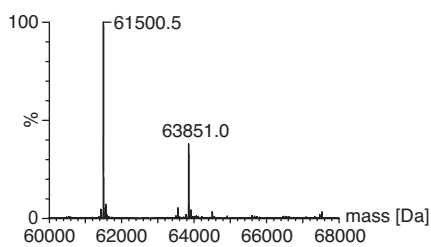

$m_1 = 61500.5$  Da: no glycan  $m_1 - m_{th} = -3.4$  Da  
 $m_2 = 63851.0$  Da: N298   $m_2 - m_1 = 2350.5$  Da

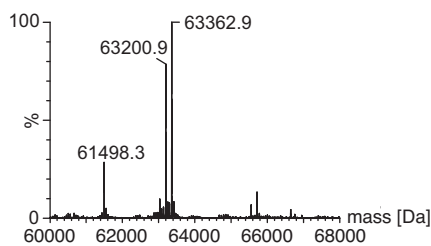

$m_1 = 61498.3$  Da: no glycan  $m_1 - m_{th} = -5.6$  Da  
 $m_2 = 63200.9$  Da: N198   $m_2 - m_1 = 1702.6$  Da  
 $m_3 = 63362.9$  Da: N198   $m_3 - m_1 = 1864.6$  Da

1  
2  
3  
4  
5  
6  
7  
8  
9  
10  
11  
12  
13  
14  
15  
16  
17  
18  
19  
20  
21  
22  
23  
24  
25  
26  
27  
28  
29  
30  
31  
32  
33  
34  
35  
36  
37  
38  
39  
40  
41  
42  
43  
44  
45  
46  
47  
48  
49  
50  
51  
52  
53  
54  
55  
56  
57  
58  
59  
60

For Peer Review

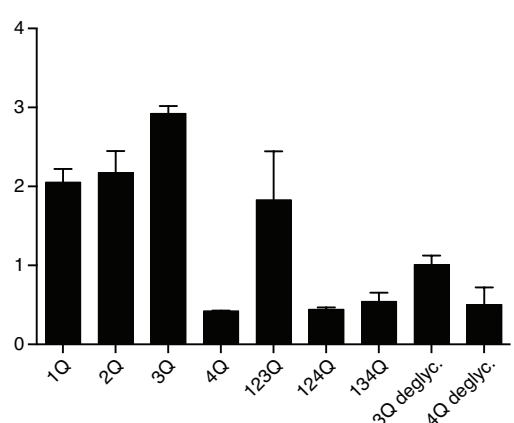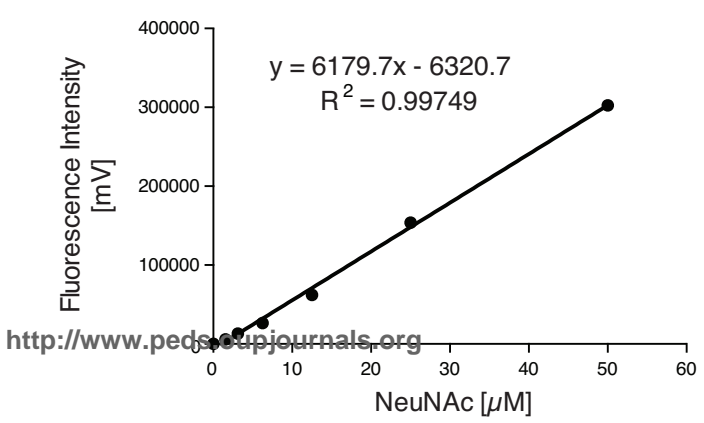

F8-IL12p40 C175S: Nhel – signal peptide – IL12p40C175S – L1(BahmHI) - F8VH(L2)F8VL – Stop – NotI

GCTAGCGTCGACCATGGGCTGGAGCCTGATCCTCCTGTTCCCTCGTCGCTGTGGCTACAGGTGTGCACCTCGatgtgggagctggagaaagacgtttatgtttagaggtggactg
ga1tcccagatgccccctggagaaacagtgaacctcaccctgtgacacgcctgaagaagatgacatcaccctggacctcagaccagagacatggagtcataaggtctctgaaagacct
ga2atcactgtcaaaagatttctagatgctggccagtagacacctgccacaaaggagcgcagactctgagccactcacatctgctgctccacaagaaggaaatggaatttggtc
ca3tgaattttaaaaaatttcaaaaaaacagacttccctgaaagtgtgaagcaccacaaattactccggacggttcacgtgctcatggctggtgcaaagaacaatggacttgaagtt
ca4atcaagagcagtagcagttcccctgactctcgggcagtgacatgtggaatggcgtctctgtctcagagaaggctcacactggaccacaaagggaactatgagaagatctcagt
gt5tgccaggaggatgtcaccagcccaactgcccaggagaccctgccattgaaactggcgttggaaagcagggcagcagaataaataatgagaactacagcaccagcttcttcat
ca6ggagacatcacaaccagaccgcccaagaacttgcagatgagggccttgaagaactcacaggtggaggtcagctgggagtagaccctgactcctggagcactccccatctcta
ct7tcccctcaagttcttggctgcaatccagcgcgaagaagaagaatgaaaggagacagaggaggggtgtaaccagaaaggctgcttccctgtagagaggacatctaccgaa
gt8tgcaaaagcgggaatgtctgctgcaagctcaggatcgtattacaattcctcgtgcagcaagtgggcagtggttccctgagggctccgatccGGTGGAGGGCGGTTTCAGG
CG9AGGTGGCTTCGGCGGTGGCGGATCAGAGGTGCAGCTGTTGGAGTCTGGGGGAGGCTTGGTACAGCTCGGGGGTCCCTGAGACTCTCCCTGAGACTCTGGATTACCTT
TAG10CTGTTTACGATGAGCTGGGTCGCCAGGCTCCAGGGAAGGGGCTGGAGTGGGCTTCAGCTATTAGTGGTAGTGGTGGTAGCACATACTACGCAGACTCCGTGAAGGGCCG
GT11ACCATCTCCAGAGCAATTCGAAGAACACCGCTGTATCTGCAAAATGAACAGCCTGAGAGCCGAGGACACGGCCGTATATTACTGTGCGAAAAGTACTCATTGTATCTTTT
TC12ACTGGGGCCAGGAACTGGTCACCGTCTCGAGTGGCGGTAGCGGAGGGAAATGTGTTGACGACAGCTCCAGGCACCTGTCTTGTCTCCAGGGAAAGAGCCAC
CC13CTTCAGGGCCAGTCAAGAGTGTAGCATGCCGTTTTAGCCTGGTACCAGCAGAAACCTGGCCAGGCTCCAGGCTCCTCATCTATGGTGCATCCAGCAGGGCCACTGG
CAT14CCAGAGGTTTCACTGGCAGTGGTCTGGGACAGACTTCACTCTCACCATCAGCAGACTGGAGCTGAAGATTTTGCAGTGTATTACTGTGTCAGCAGATGCGTGGTTCGGCC
GCC15ACGTTTCGGCCAAGGGACCAAGGTGGAAATCAAATAGTGGAGCGGCCG

1Q: Nhel – signal peptide – IL12p40C175S1g – L1(BahmHI) - F8VH(L2)F8VL – Stop – NotI

GCTAGCGTCGACCATGGGCTGGAGCCTGATCCTCCTGTTCCCTCGTCGCTGTGGCTACAGGTGTGCACCTCGatgtgggagctggagaaagacgtttatgtttagaggtggactg
ga1tcccagatgccccctggagaaacagtgaacctcaccctgtgacacgcctgaagaagatgacatcaccctggacctcagaccagagacatggagtcataaggtctctgaaagacct
ga2atcactgtcaaaagatttctagatgctggccagtagacacctgccacaaaggagcgcagactctgagccactcacatctgctgctccacaagaaggaaatggaatttggtc
ca3tgaattttaaaaaatttcaaaaaaacagacttccctgaaagtgtgaagcaccacaaattactccggacggttcacgtgctcatggctggtgcaaagaacaatggacttgaagtt
ca4atcaagagcagtagcagttcccctgactctcgggcagtgacatgtggaatggcgtctctgtctcagagaaggctcacactggaccacaaagggaactatgagaagatctcagt
gt5tgccaggaggatgtcaccagcccaactgcccaggagaccctgccattgaaactggcgttggaaagcagggcagcagaataaataatgagaactacagcaccagcttcttcat
ca6ggagacatcacaaccagaccgcccaagaacttgcagatgagggccttgaagaactcacaggtggaggtcagctgggagtagaccctgactcctggagcactccccatctcta
ct7tcccctcaagttcttggctgcaatccagcgcgaagaagaagaatgaaaggagacagaggaggggtgtaaccagaaaggctgcttccctgtagagaggacatctaccgaa
gt8tgcaaaagcgggaatgtctgctgcaagctcaggatcgtattacaattcctcgtgcagcaagtgggcagtggttccctgagggctccgatccGGTGGAGGGCGGTTTCAGG
CG9AGGTGGCTTCGGCGGTGGCGGATCAGAGGTGCAGCTGTTGGAGTCTGGGGGAGGCTTGGTACAGCTCGGGGGTCCCTGAGACTCTCCCTGAGACTCTGGATTACCTT
TAG10CTGTTTACGATGAGCTGGGTCGCCAGGCTCCAGGGAAGGGGCTGGAGTGGGCTTCAGCTATTAGTGGTAGTGGTGGTAGCACATACTACGCAGACTCCGTGAAGGGCCG
GT11ACCATCTCCAGAGCAATTCGAAGAACACCGCTGTATCTGCAAAATGAACAGCCTGAGAGCCGAGGACACGGCCGTATATTACTGTGCGAAAAGTACTCATTGTATCTTTT
TC12ACTGGGGCCAGGAACTGGTCACCGTCTCGAGTGGCGGTAGCGGAGGGGAAATGTGTTGACGACAGCTCCAGGCACCTGTCTTGTCTCCAGGGAAAGAGCCAC
CC13CTTCAGGGCCAGTCAAGAGTGTAGCATGCCGTTTTAGCCTGGTACCAGCAGAAACCTGGCCAGGCTCCAGGCTCCTCATCTATGGTGCATCCAGCAGGGCCACTGG
CAT14CCAGAGGTTTCACTGGCAGTGGTCTGGGACAGACTTCACTCTCACCATCAGCAGACTGGAGCTGAAGATTTTGCAGTGTATTACTGTGTCAGCAGATGCGTGGTTCGGCC
GCC15ACGTTTCGGCCAAGGGACCAAGGTGGAAATCAAATAGTGGAGCGGCCG

2Q: Nhel – signal peptide – IL12p40C175S2g – L1(BahmHI) - F8VH(L2)F8VL – Stop – NotI

GCTAGCGTCGACCATGGGCTGGAGCCTGATCCTCCTGTTCCCTCGTCGCTGTGGCTACAGGTGTGCACCTCGatgtgggagctggagaaagacgtttatgtttagaggtggactg
ga1tcccagatgccccctggagaaacagtgaacctcaccctgtgacacgcctgaagaagatgacatcaccctggacctcagaccagagacatggagtcataaggtctctgaaagacct
ga2atcactgtcaaaagatttctagatgctggccagtagacacctgccacaaaggagcgcagactctgagccactcacatctgctgctccacaagaaggaaatggaatttggtc
ca3tgaattttaaaaaatttcaaaaaaacagacttccctgaaagtgtgaagcaccacaaattactccggacggttcacgtgctcatggctggtgcaaagaacaatggacttgaagtt
ca4atcaagagcagtagcagttcccctgactctcgggcagtgacatgtggaatggcgtctctgtctcagagaaggctcacactggaccacaaagggaactatgagaagatctcagt
gt5tgccaggaggatgtcaccagcccaactgcccaggagaccctgccattgaaactggcgttgaagaactcacaggtggaggtcagctgggagtagaccctgactcctggagcactccccatctcta
ca6ggagacatcacaaccagaccgcccaagaacttgcagatgagggccttgaagaactcacaggtggaggtcagctgggagtagaccctgactcctggagcactccccatctcta
ct7tcccctcaagttcttggctgcaatccagcgcgaagaagaagaatgaaaggagacagaggaggggtgtaaccagaaaggctgcttccctgtagagaggacatctaccgaa
gt8tgcaaaagcgggaatgtctgctgcaagctcaggatcgtattacaattcctcgtgcagcaagtgggcagtggttccctgagggctccgatccGGTGGAGGGCGGTTTCAGG
CG9AGGTGGCTTCGGCGGTGGCGGATCAGAGGTGCAGCTGTTGGAGTCTGGGGGAGGCTTGGTACAGCTCGGGGGTCCCTGAGACTCTCCCTGAGACTCTGGATTACCTT
TAG10CTGTTTACGATGAGCTGGGTCGCCAGGCTCCAGGGAAGGGGCTGGAGTGGGCTTCAGCTATTAGTGGTAGTGGTGGTAGCACATACTACGCAGACTCCGTGAAGGGCCG
GT11ACCATCTCCAGAGCAATTCGAAGAACACCGCTGTATCTGCAAAATGAACAGCCTGAGAGCCGAGGACACGGCCGTATATTACTGTGCGAAAAGTACTCATTGTATCTTTT
TC12ACTGGGGCCAGGAACTGGTCACCGTCTCGAGTGGCGGTAGCGGAGGGGAAATGTGTTGACGACAGCTCCAGGCACCTGTCTTGTCTCCAGGGAAAGAGCCAC
CC13CTTCAGGGCCAGTCAAGAGTGTAGCATGCCGTTTTAGCCTGGTACCAGCAGAAACCTGGCCAGGCTCCAGGCTCCTCATCTATGGTGCATCCAGCAGGGCCACTGG
CAT14CCAGAGGTTTCACTGGCAGTGGTCTGGGACAGACTTCACTCTCACCATCAGCAGACTGGAGCTGAAGATTTTGCAGTGTATTACTGTGTCAGCAGATGCGTGGTTCGGCC
GCC15ACGTTTCGGCCAAGGGACCAAGGTGGAAATCAAATAGTGGAGCGGCCG

3Q: Nhel – signal peptide – IL12p40C175S3g – L1(BahmHI) - F8VH(L2)F8VL – Stop – NotI

GCTAGCGTCGACCATGGGCTGGAGCCTGATCCTCCTGTTCCCTCGTCGCTGTGGCTACAGGTGTGCACCTCGatgtgggagctggagaaagacgtttatgtttagaggtggactg
ga1tcccagatgccccctggagaaacagtgaacctcaccctgtgacacgcctgaagaagatgacatcaccctggacctcagaccagagacatggagtcataaggtctctgaaagacct
ga2atcactgtcaaaagatttctagatgctggccagtagacacctgccacaaaggagcgcagactctgagccactcacatctgctgctccacaagaaggaaatggaatttggtc
ca3tgaattttaaaaaatttcaaaaaaacagacttccctgaaagtgtgaagcaccacaaattactccggacggttcacgtgctcatggctggtgcaaagaacaatggacttgaagtt
ca4atcaagagcagtagcagttcccctgactctcgggcagtgacatgtggaatggcgtctctgtctcagagaaggctcacactggaccacaaagggaactatgagaagatctcagt
gt5tgccaggaggatgtcaccagcccaactgcccaggagaccctgccattgaaactggcgttgaagaactcacaggtggaggtcagctgggagtagaccctgactcctggagcactccccatctcta
ca6ggagacatcacaaccagaccgcccaagaacttgcagatgagggccttgaagaactcacaggtggaggtcagctgggagtagaccctgactcctggagcactccccatctcta
ct7tcccctcaagttcttggctgcaatccagcgcgaagaagaagaatgaaaggagacagaggaggggtgtaaccagaaaggctgcttccctgtagagaggacatctaccgaa
gt8tgcaaaagcgggaatgtctgctgcaagctcaggatcgtattacaattcctcgtgcagcaagtgggcagtggttccctgagggctccgatccGGTGGAGGGCGGTTTCAGG
CG9AGGTGGCTTCGGCGGTGGCGGATCAGAGGTGCAGCTGTTGGAGTCTGGGGGAGGCTTGGTACAGCTCGGGGGTCCCTGAGACTCTCCCTGAGACTCTGGATTACCTT
TAG10CTGTTTACGATGAGCTGGGTCGCCAGGCTCCAGGGAAGGGGCTGGAGTGGGCTTCAGCTATTAGTGGTAGTGGTGGTAGCACATACTACGCAGACTCCGTGAAGGGCCG
GT11ACCATCTCCAGAGCAATTCGAAGAACACCGCTGTATCTGCAAAATGAACAGCCTGAGAGCCGAGGACACGGCCGTATATTACTGTGCGAAAAGTACTCATTGTATCTTTT
TC12ACTGGGGCCAGGAACTGGTCACCGTCTCGAGTGGCGGTAGCGGAGGGGAAATGTGTTGACGACAGCTCCAGGCACCTGTCTTGTCTCCAGGGAAAGAGCCAC
CC13CTTCAGGGCCAGTCAAGAGTGTAGCATGCCGTTTTAGCCTGGTACCAGCAGAAACCTGGCCAGGCTCCAGGCTCCTCATCTATGGTGCATCCAGCAGGGCCACTGG
CAT14CCAGAGGTTTCACTGGCAGTGGTCTGGGACAGACTTCACTCTCACCATCAGCAGACTGGAGCTGAAGATTTTGCAGTGTATTACTGTGTCAGCAGATGCGTGGTTCGGCC
GCC15ACGTTTCGGCCAAGGGACCAAGGTGGAAATCAAATAGTGGAGCGGCCG

52
53
54
55
56
57
58
59
60

1  
2  
3  
4  
5  
6  
7  
8  
9  
10  
11  
12  
13  
14  
15  
16  
17  
18  
19  
20  
21  
22  
23  
24  
25  
26  
27  
28  
29  
30  
31  
32  
33  
34  
35  
36  
37  
38  
39  
40  
41  
42  
43  
44  
45  
46  
47  
48  
49  
50  
51  
52  
53  
54  
55  
56  
57  
58  
59  
60

1230: NheI – signal peptide – IL12p40C175S123g – L1(BahmHI) - F8VH(L2)F8VL – Stop – NotI

GCCTAGCGTCGACCATGGGCTGGAGCCTGATCCTCCTGTTCCCTCGTCGCTGTGGCTACAGGTTGCACTCGatgtgggagctggagaaagacgtttatgtttagaggtggactg  
gactccccgatgccccctggagaacagtgcagctcacctgtgacacgcctgaagaagatgacatcacctggacctcagaccagagacatggagtcataaggctctggaaagacct  
gacatcacctgtcaaaagagtttctagatgctggccagtacacctgccacaaaggagggcagactctgagccactcacatctgctgctccacaagaaggaaatggaatttggtc  
ca10aaattttaaaaaatttcaaaaacaagactttcctgaaagtgtgaagcaccacaatactccggacggttcacgtgctcatggctgggtgcaaaagaacatgacttgaagtt  
caagatcaagagcagtagcagttccctgactctcgggcagtgcagtgtgaaatggcctctctgtctgcagagaaggtcacactggaccaaaggactatggaagatattcagt  
gtctcgccaggaggtgtcaccagcccaactgccaggagacacctgccattgaaactggcgttgaagcacggcagcagaataaatatgagcagtagacgaccagcttcttcat  
ca12gacatcatcaaacagaccgcccaagaacttgacagtagggcctttgaagaactcacaggtggaggtcagctgggagtagacctgactcctggagcactccccattccta  
ct13ccctcaagttctttgtcgaatccagcgcgaagaagaagaagatgaaggagacagagaggggtgtaaccagaaaaggtgcgttccctgtagagagggacatctaccgaaatc  
cca14gcaaggcgggaatgtctgctgcaagctcaggatcgctattacaattcctctgtgcagcaagtgggcatgtgttccctgcagggtccgatccGGTGGAGGCGGTTTCAGG  
CCGATGGTGGCTCTGGCGGTGGCCGATCAGAGGTGCAGCTGTTGGAGTCTGGGGAGGCTTGGTACAGCTGGGGGTCCCTGAGACTCTCCCTGAGCAGCTCTGGATTACCTT  
TA15TGTGTTACGATGAGCTGGGTCCGCGAGGCTCCAGGAAAGGGGCTGGAGTGGGCTTCAGCTATTAGTGGTAGTGGTGGTAGCACATACTACGCAGACTCCGTGAAGGCCCG  
GT16ACCATCTCCAGAGACAATTCCAAGAACACGCTGTATCTGCAAAATGAACAGCCTGAGAGCCGAGGACACGGCCGTATATTACTGTGCGAAAAGTACTCATTTGTATCTTTT  
TGACTACTGGGCCCAGGGAACCTGGTCAACCTGTCGAGTGGCCGATAGCGGAGGAAATTTGTTGACGCAGCTCCAGGCACCTCTGCTTTGTCTCCAGGGGAAAGGCCAC  
CC17TCTCTGAGGCCAGTCCAGAGTGTAGCATGCCCCTTTTACCTGCTGACCCAGCAGAACTGGCCAGGCTCCAGGCTCCTCATCTATGGTGCATCCAGCAGGGCCACTGG  
CA18CCAGACAGGTTCACTGGCAGTGGGTCTGGGACAGACTTCACCTCTCACCATCAGCAGACTGGAGCCTGAAGATTTTGCAGTGTATTACTGTCCAGCAGATGCGTGGTCGGCC  
GCCGACGTTTCGGCCAAGGGACCAAGGTGGAAATCAAATAGTGAGCGGCCG

1240: NheI – signal peptide – IL12p40C175S124g – L1(BahmHI) - F8VH(L2)F8VL – Stop – NotI

GCCTAGCGTCGACCATGGGCTGGAGCCTGATCCTCCTGTTCCCTCGTCGCTGTGGCTACAGGTTGCACTCGatgtgggagctggagaaagacgtttatgtttagaggtggactg  
ga21ccgatgccccctggagaacagtgcagctcacctgtgacacgcctgaagaagatgacatcacctggacctcagaccagagacatggagtcataaggctctggaaagacct  
gacatcacctgtcaaaagagtttctagatgctggccagtacacctgccacaaaggagggcagactctgagccactcacatctgctgctccacaagaaggaaatggaatttggtc  
ca22gaaattttaaaaaatttcaaaaacaagactttcctgaaagtgtgaagcaccacaatactccggacggttcacgtgctcatggctgggtgcaaaagaacatgacttgaagtt  
ca24tcaagagcagtagcagttccctgactctcgggcagtgcagtgtgaaatggcgtctctgtctgcagagaaggtcacactggaccaaaggactatgagaagattcagt  
gtctcgccaggaggtgtcaccagcccaactgccaggagacacctgccattgaaactggcgttgaagcacggcagcagaataaatatgagaactacagcaccagcttcttcat  
ca26gacatcatcaaacagaccgcccaagaacttgacagtagggcctttgaagaactcacaggtggaggtcagctgggagtagacctgactcctggagcactccccattccta  
ct27ccctcaagttctttgtcgaatccagcgcgaagaagaagaagatgaaggagacagagaggggtgtaaccagaaaaggtgcgttccctgtagagagggactataccgaaatc  
cca28gcaaggcgggaatgtctgctgcaagctcaggatcgctattacaattcctctgtgcagcaagtgggcatgtgttccctgcagggtccgatccGGTGGAGGCGGTTTCAGG  
CCGATGGTGGCTCTGGCGGTGGCCGATCAGAGGTGCAGCTGTTGGAGTCTGGGGAGGCTTGGTACAGCTGGGGGTCCCTGAGACTCTCCCTGTGCAGCCTCTGGATTACCTT  
TA29TGTGTTACGATGAGCTGGGTCCGCGAGGCTCCAGGAAAGGGGCTGGAGTGGGCTTCAGCTATTAGTGGTAGTGGTGGTAGCACATACTACGCAGACTCCGTGAAGGCCCG  
GT30ACCATCTCCAGAGACAATTCCAAGAACACGCTGTATCTGCAAAATGAACAGCCTGAGAGCCGAGGACACGGCCGTATATTACTGTGCGAAAAGTACTCATTTGTATCTTTT  
TGACTACTGGGCCCAGGGAACCTGGTCAACCTGTCGAGTGGCCGATAGCGGAGGAAATTTGTTGACGCAGCTCCAGGCACCTCTCCAGGCACCTCTGCTTTGTCTCCAGGGGAAAGGCCAC  
CC31TCTCTGAGGCCAGTCCAGAGTGTAGCATGCCCCTTTTACCTGCTGACCCAGCAGAACTGGCCAGGCTCCAGGCTCCTCATCTATGGTGCATCCAGCAGGGCCACTGG  
CA32CCAGACAGGTTCACTGGCAGTGGGTCTGGGACAGACTTCACCTCTCACCATCAGCAGACTGGAGCCTGAAGATTTTGCAGTGTATTACTGTCCAGCAGATGCGTGGTCGGCC  
GCCGACGTTTCGGCCAAGGGACCAAGGTGGAAATCAAATAGTGAGCGGCCG

1340: NheI – signal peptide – IL12p40C175S134g – L1(BahmHI) - F8VH(L2)F8VL – Stop – NotI

GCCTAGCGTCGACCATGGGCTGGAGCCTGATCCTCCTGTTCCCTCGTCGCTGTGGCTACAGGTTGCACTCGatgtgggagctggagaaagacgtttatgtttagaggtggactg  
ga35ccgatgccccctggagaacagtgcagctcacctgtgacacgcctgaagaagatgacatcacctggacctcagaccagagacatggagtcataaggctctggaaagacct  
gacatcacctgtcaaaagagtttctagatgctggccagtacacctgccacaaaggagggcagactctgagccactcacatctgctgctccacaagaaggaaatggaatttggtc  
ca37gaaattttaaaaaatttcaaaaacaagactttcctgaaagtgtgaagcaccacaatactccggacggttcacgtgctcatggctgggtgcaaaagaacatgacttgaagtt  
ca39tcaagagcagtagcagttccctgactctcgggcagtgcagtgtgaaatggcgtctctgtctgcagagaaggtcacactggaccaaaggactatgagaagattcagt  
gtctcgccaggaggtgtcaccagcccaactgccaggagacacctgccattgaaactggcgttgaagcacggcagcagaataaatatgagcctacagcaccagcttcttcat  
ca41gacatcatcaaacagaccgcccaagaacttgacagtagggcctttgaagaactcacaggtggaggtcagctgggagtagacctgactcctggagcactccccattccta  
ct42ccctcaagttctttgtcgaatccagcgcgaagaagaagaagatgaaggagacagagaggggtgtaaccagaaaaggtgcgttccctgtagagagggacatctaccgaaatc  
ca44gcaaggcgggaatgtctgctgcaagctcaggatcgctattacaattcctcgtgcagcaagtgggcatgtgttccctgcagggtccgatccGGTGGAGGCGGTTTCAGG  
GG45TGGCTCTGGCGGTGGCCGATCAGAGGTGCAGCTGTTGGAGTCTGGGGAGGCTTGGTACAGCTGGGGGTCCCTGAGACTCTCCTGTGCAGCCTCTGGATTACCTTT  
AGCTGTTTACGATGAGCTGGGTCCGCCAGGCTCCAGGAAAGGGGCTGGAGTGGGCTTCAGCTATTAGTGGTAGTGGTGGTAGCACATACTACGCAGACTCCGTGAAGGCCGG  
TT46CACATCTCCAGAGACAATTCCAAGAACACGCTGTATCTGCAAAATGAACAGCCTGAGAGCCGAGGACACGGCCGTATATTACTGTGCGAAAAGTACTCATTTGTATCTTTT  
GA48CTGGGGCCAGGGAACCTGGTACCGTCTCGAGTGGCGGTAGCGGAGGGGAAATTTGTTGACGCAGCTCCAGGCACCTCTCTTTGTCTCCAGGGGAAAGGCCACC  
CT49TCTGCAGGGCCAGTCCAGAGTGTAGCATGCCGCTTTTACCTGTTACCAGCAGAACTGGCCAGGCTCCAGGCTCCTCATCTATGGTGCATCCAGCAGGGCCACTGGC  
AT50CAGACAGGTTCACTGGCAGTGGGTCTGGGACAGACTTCACCTCTCACCATCAGCAGACTGGAGCCTGAAGATTTTGCAGTGTATTACTGTCCAGCAGATGCGTGGTCGGCC  
CC51GTTTCGGCCAAGGGACCAAGGTGGAAATCAAATAGTGAGCGGCCG
